# Supplementary material
Source: HighWire-hosted journal article supplement (https://www.life-science-alliance.org/content/5/5/e202201379/F11)

F

Supplementary Figure 7.

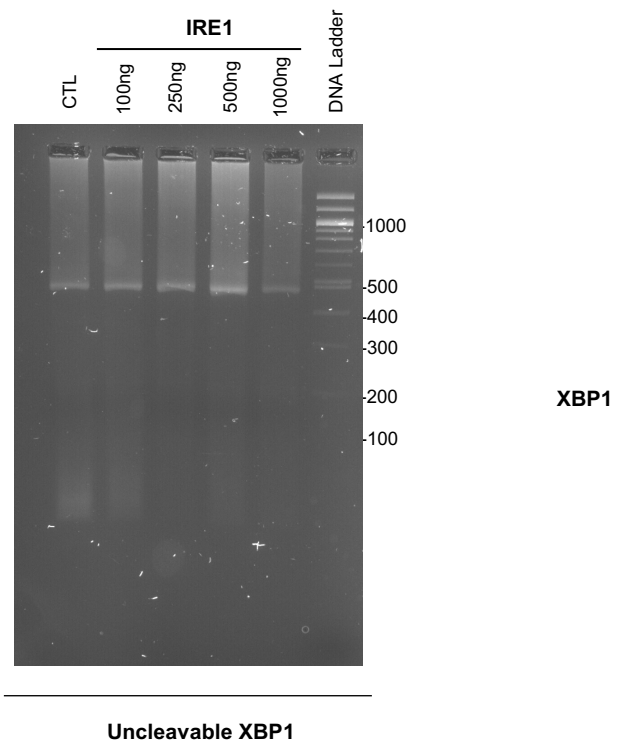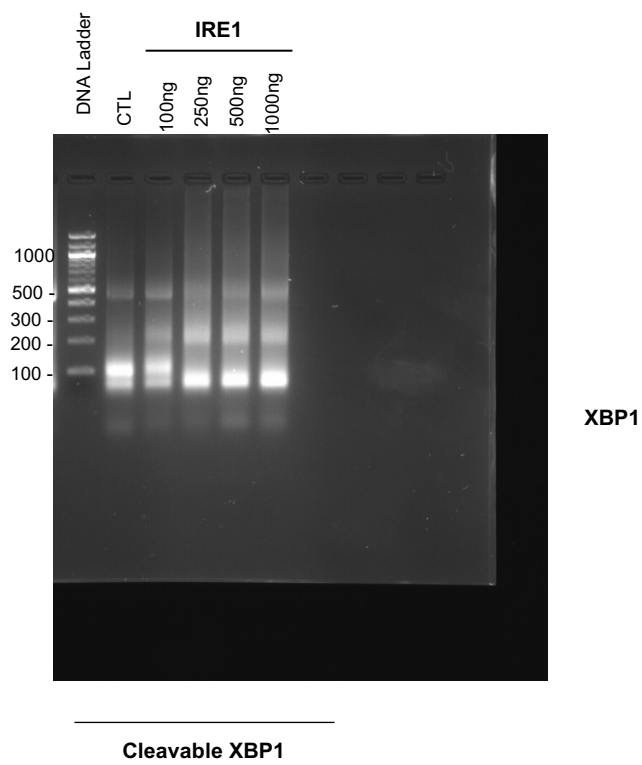

Supplement: inline-supplementary-material-10 [file inline-supplementary-material-10.zip]
